# Supplementary material for: Lectin-Mediated Bacterial Modulation by the Intestinal Nematode Ascaris suum
Source: MDPI journal article supplement (doi:10.3390/ijms22168739), 2021-08-14
Supplement: s1 [file s1]

**Table S1.** AsCTL-42 impairs porcine epithelial cell invasion by *Salmonella*.<sup>1</sup>

|                                            | Experiment 1                        |                                       | Experiment 2                        |                                       | Experiment 3                        |                                       |
|--------------------------------------------|-------------------------------------|---------------------------------------|-------------------------------------|---------------------------------------|-------------------------------------|---------------------------------------|
|                                            | Inoculum<br>(Mean CFU)              | Number of<br>Epithelial<br>Cells/Well | Inoculum<br>(Mean CFU)              | Number of<br>Epithelial<br>Cells/Well | Inoculum<br>(Mean CFU)              | Number of<br>Epithelial<br>Cells/Well |
|                                            | 179,000                             | 50,000                                | 82,000                              | 50,000                                | 121,667                             | 50,000                                |
|                                            | Multiplicity of Infection (moi) = 4 |                                       | Multiplicity of Infection (moi) = 2 |                                       | Multiplicity of Infection (moi) = 2 |                                       |
| Treatment                                  | Mean (CFU/mL)                       | % Invasion Rel. to<br>Control         | Mean (CFU/mL)                       | % Invasion Rel. to<br>Control         | Mean (CFU/mL)                       | % Invasion Rel. to<br>Control         |
| AsCTL-42 0 µg/mL                           | 12,600                              | 100                                   | 48,133                              | 100                                   | 9,800                               | 100                                   |
| AsCTL-42 100 µg/mL                         | 8,467                               | 67                                    | 36,733                              | 76                                    | 6,333                               | 65                                    |
| AsCTL-42 500 µg/mL                         | 6,607                               | 48                                    | 29,333                              | 61                                    | 4,733                               | 48                                    |
| AsCTL-42 100 µg/mL<br>+ IPEC pre-treatment | 14,533                              | 115                                   | 51,733                              | 107                                   | 8,600                               | 88                                    |
| AsCTL-42 500 µg/mL<br>+ IPEC pre-treatment | 14,000                              | 111                                   | 47,400                              | 98                                    | 8,333                               | 85                                    |
| AsCTL-42 100 µg/mL<br>+ ST pre-treatment   | 8,400                               | 67                                    | 29,922                              | 62                                    | 5,667                               | 58                                    |
| AsCTL-42 500 µg/mL<br>+ ST pre-treatment   | 2,800                               | 22                                    | 19,000                              | 39                                    | 3,000                               | 31                                    |

<sup>1</sup>Data presented here as CFU counts from the individual experiments collated in Figure 3.
