# Supplementary material for: Lectin-Mediated Bacterial Modulation by the Intestinal Nematode Ascaris suum
Source: MDPI journal article supplement (doi:10.3390/ijms22168739), 2021-08-14
Supplement: s1 [file s1]

| <b>Table S2.</b> Synthetic glycans tested for AsCTL-42-glycan binding in glycan array <sup>1</sup> . |                                   |                                                         |
|------------------------------------------------------------------------------------------------------|-----------------------------------|---------------------------------------------------------|
| <b>Glycan</b>                                                                                        | Microbial origin (if applicable)  | Mean Fluorescence Intensity (MFI) for ConA <sup>2</sup> |
| Neu5Ac(a2-6)Gal(b1-4)GlcNAc(b1-3)Gal(b1-4)Glc(b1-1)aminohexanol                                      |                                   | 337,5                                                   |
| Neu5Ac(a2-3)Gal(b1-3)GlcNAc(b1-3)Gal(b1-4)Glc(b1-1)aminohexanol                                      |                                   | 224                                                     |
| Fuc(a1-3)[Neu5Ac(a2-3)Gal(b1-4)]GlcNAc(b1-3)Gal(b1-4)Glc(b1-1)aminohexanol                           |                                   | 0                                                       |
| Neu5Ac(a2-6)Gal(b1-4)Glc(b1-1)aminohexanol                                                           |                                   | 188,5                                                   |
| Neu5Ac(a2-3)Gal(b1-4)Glc(b1-1)aminohexanol                                                           |                                   | 251,5                                                   |
| Neu5Ac(a2-6)Gal(b1-4)GlcNAc-6-sulfate(b1-1)aminohexanol                                              |                                   | 0                                                       |
| Gal(b1-4)Glc(b1-1)aminohexano                                                                        |                                   | 1116,5                                                  |
| Gal(b1-4)GlcNAc-6-sulfate(b1-1)aminohexanol                                                          |                                   | 0                                                       |
| Araf(a1-5)Araf(a1-1)aminopentanol                                                                    | <i>Mycobacterium tuberculosis</i> | 1628,5                                                  |
| Araf(a1-5)Araf(a1-3)[Araf(a1-5)Araf(a1-5)]Araf(a1-5)Araf(a1-1)aminopentanol                          | <i>Mycobacterium tuberculosis</i> | 1807                                                    |
| Araf(a1-3)[Araf(a1-5)]Araf(a1-1)aminopentanol                                                        | <i>Mycobacterium tuberculosis</i> | 1815,5                                                  |
| Araf(a1-5)Araf(a1-5)Araf(a1-5)Araf(a1-5)Araf(a1-5)Araf(a1-5)aminopentanol                            | <i>Mycobacterium tuberculosis</i> | 1890                                                    |
| Col(a1-3)[Col(a1-6)]Glc(a1-4)Gal(a1-3)GlcNAc(b1-1)aminopentanol                                      | <i>Escherichia coli</i> O111      | 367                                                     |
| ManNAc(b1-3)FucNAc(a1-3)GalNAc(a1-4)Gal(a1-1)aminopentanol                                           | <i>Streptococcus pneumoniae</i>   | 208,5                                                   |
| GalNAc(a1-4)Gal(a1-1)aminopentanol                                                                   | <i>Streptococcus pneumoniae</i>   | 1649                                                    |

|                                                         |                                 |         |
|---------------------------------------------------------|---------------------------------|---------|
| GalNAc(b1-4)Gal(a1-1)aminopentanol                      |                                 | 1492,5  |
| FucNAc(a1-3)GalNAc(a1-4)Gal(a1-1)aminopentanol          | <i>Streptococcus pneumoniae</i> | 244     |
| FucNAc(b1-3)GalNAc(a1-4)Gal(a1-1)aminopentanol          |                                 | 250     |
| GalNAc(b1-1)aminoethanol                                |                                 | 2051,5  |
| FucNAc(a1-1)aminopentanol                               |                                 | 622     |
| Man(a1-2)Man(a1-2)[Gal(b1-4)]Man(a1-1)aminopentanol     | <i>Leishmania donovani</i>      | 12566   |
| Man(a1-2)Man(a1-2)Man(a1-1)aminopentanol                | <i>Leishmania donovani</i>      | 10525,5 |
| Gal(b1-4)Man(a1-1)aminopentanol                         | <i>Leishmania chagasi</i>       | 1940    |
| Man(a1-2)Man(a1-1)aminopentanol                         |                                 | 16754   |
| Glc(b1-1)aminoethanol                                   |                                 | 0       |
| GlcNAc(a1-2)Hep(a1-3)Hep(a1-5)Kdo(a2-1)aminopentanol    | <i>Neisseria meningitidis</i>   | 491     |
| Hep(a1-3)Hep(a1-5)Kdo(a2-1)aminopentanol                | <i>Neisseria meningitidis</i>   | 539,5   |
| Hep(a1-3)Hep(a1-5)[L-Ara4N(b1-8)]Kdo(a2-1)aminopentanol | <i>Proteus spp.</i>             | 216,5   |
| Hep(a1-7)Hep(a1-3)Hep(a1-5)Kdo(a2-1)aminopentanol       | <i>Yersinia pesti</i>           | 168,5   |
| Hep(a1-2)Hep(a1-3)Hep(a1-5)Kdo(a2-1)aminopentanol       | <i>Haemophilus influenzae</i>   | 695     |
| Hep(a1-5)Kdo(a2-1)aminopentanol                         |                                 | 879     |
| Hep(a1-7)Hep(a1-3)Hep(a1-1)aminopentanol                | <i>Yersinia pesti</i>           | 437,5   |
| Kdo(a2-8)Kdo(a2-4)Kdo(a2-1)aminopentanol                | <i>Chlamydia spp.</i>           | 551     |
| Kdo(a2-1)aminopentanol                                  |                                 | 103,5   |
| Hep(a1-1)aminopentanol                                  |                                 | 866,5   |
| Glc(b1-1)aminopentanol                                  |                                 | 344     |
| D-FucNAc(b1-1)aminopentanol                             |                                 | 620,5   |
| FucNAc(b1-1)aminopentanol                               |                                 | 296     |

|                                                               |                                 |        |
|---------------------------------------------------------------|---------------------------------|--------|
| Glc(b1-3)D-FucNAc(b1-1)aminopentanol                          | <i>Pseudomonas aeruginosa</i>   | 367,5  |
| Glc(b1-3)FucNAc(b1-1)aminopentanol                            | <i>Pseudomonas aeruginosa</i>   | 635,5  |
| Gal(b1-3)GalNAc(a1-1)aminopentanol                            |                                 | 1080,5 |
| Fuc(a1-3)[Gal(b1-4)]GlcNAc(b1-1)aminopentanol                 |                                 | 14,5   |
| Neu5Ac(a2-6)GalNAc(a1-1)aminopentanol                         |                                 | 118,5  |
| Gal(b1-4)[Gal(b1-4)Glc(b1-6)]GlcNAc(b1-1)aminopentanol        | <i>Streptococcus pneumoniae</i> | 555    |
| Fuc(a1-3)[Fuc(a1-2)Gal(b1-4)]GlcNAc(b1-1)aminopentanol        |                                 | 457    |
| Gal(b1-3)[Fuc(a1-4)]GlcNAc(b1-1)aminopentanol                 |                                 | 341    |
| Fuc(a1-2)Gal(b1-3)[Fuc(a1-4)]GlcNAc(b1-1)aminopentanol        |                                 | 0      |
| Gal-2,3-Pyruvate(a1-1)aminopentanol (mixture of R/S pyruvate) | <i>Streptococcus pneumoniae</i> | 239,5  |
| Gal(a1-3)Gal(b1-4)Glc(b1-1)aminopentanol                      |                                 | 248,5  |
| Gal(a1-3)Gal(b1-4)GlcNAc(b1-1)aminopentanol                   |                                 | 117,5  |
| Gal(a1-3)Gal(b1-4)GlcNAc(b1-3)Gal(b1-4)Glc(b1-1)aminopentanol |                                 | 0      |
| Gal(b1-4)GlcNAc(b1-3)Gal(b1-4)Glc(b1-1)aminopentanol          | <i>Streptococcus pneumoniae</i> | 0      |
| Fuc(a1-2)Gal(b1-3)GlcNAc(b1-3)Gal(b1-4)Glc(b1-1)aminopentanol |                                 | 1767   |
| 6 Gal(b1-3)GlcNAc(b1-3)Gal(b1-4)Glc(b1-1)aminopentanol        |                                 | 303,5  |
| Rha(a1-1)aminopentanol                                        |                                 | 0      |
| Rha(a1-3)Glc(b1-1)aminopentanol                               |                                 | 1504,5 |
| Glc(a1-2)Glc(a1-1)aminopentanol                               | <i>Clostridium difficile</i>    | 5359   |
| Glc(b1-4)Glc(a1-2)Glc(a1-1)aminopentanol                      | <i>Clostridium difficile</i>    | 3637   |
| Rha(a1-3)Glc(b1-4)Glc(a1-1)aminopentanol                      | <i>Clostridium difficile</i>    | 636,5  |

|                                                                                                  |                                 |        |
|--------------------------------------------------------------------------------------------------|---------------------------------|--------|
| Gal(b1-3)GalNAc(b1-3)Gal(a1-4)Gal(b1-4)Glc(b1-1)aminopentanol                                    |                                 | 1205,5 |
| Neu5Ac(a2-8)Neu5Ac(a2-3)[GalNAc(b1-4)]Gal(b1-4)Glc(b1-1)aminopentanol                            |                                 | 162    |
| Gal(a1-4)Gal(b1-4)Glc(b1-1)aminopentanol                                                         |                                 | 487,5  |
| GalNAc(a1-1)AminoLinker2                                                                         |                                 | 989    |
| Fuc(a1-3)[Gal(b1-4)]GlcNAc(b1-1)AminoLinker2                                                     |                                 | 735    |
| GlcNAc(a1-2)Hep(a1-3)Hep(a1-1)aminopentanol                                                      | <i>Neisseria meningitidis</i>   | 558,5  |
| Hep(a1-3)Hep(a1-1)aminopentanol                                                                  |                                 | 267,5  |
| Gal(b1-4)Glc(b1-1)aminopentanol                                                                  |                                 | 0      |
| GalNAc(b1-4)Gal(b1-4)Glc(b1-1)aminopentanol                                                      |                                 | 1193,5 |
| Neu5Ac(a2-3)Gal(b1-4)Glc(b1-1)aminopentanol                                                      |                                 | 127,5  |
| GalNAc-4-sulfate(b1-1)aminopentanol                                                              |                                 | 19     |
| IdoA-2,4-disulfate(a1-1)aminopentanol                                                            |                                 | 528    |
| IdoA(a1-3)GalNAc-4-sulfate(b1-1)aminopentanol                                                    |                                 | 237    |
| IdoA-2-sulfate(a1-3)GalNAc-4-sulfate(b1-1)aminopentanol                                          |                                 | 262    |
| IdoA(a1-3)GalNAc(b1-1)aminopentanol                                                              |                                 | 210,5  |
| GlcA(b1-4)Glc(b1-3)GlcA(b1-4)Glc(b1-1)aminoethanol                                               | <i>Streptococcus pneumoniae</i> | 378    |
| Glc(b1-3)GlcA(b1-4)Glc(b1-1)aminoethanol                                                         | <i>Streptococcus pneumoniae</i> | 1456   |
| GalNAc(a1-1)Thr-Linker                                                                           |                                 | 10,5   |
| Glc(b1-3)Glc(b1-3)[Glc(b1-6)]Glc(b1-3)Glc(b1-1)aminopentanol                                     | <i>Candida spp.</i>             | 132,5  |
| Glc(b1-3)Glc(b1-3)[Glc(b1-6)]Glc(b1-3)Glc(b1-3)Glc(b1-3)Glc(b1-3)Glc(b1-1)aminopentanol          | <i>Candida spp.</i>             | 236    |
| Glc(b1-3)Glc(b1-3)[Glc(b1-6)]Glc(b1-3)Glc(b1-3)Glc(b1-3)Glc(b1-3)Glc(b1-3)Glc(b1-1)aminopentanol | <i>Candida spp.</i>             | 100,5  |

|                                                                                                                  |                                 |        |
|------------------------------------------------------------------------------------------------------------------|---------------------------------|--------|
| Glc(b1-3)Glc(b1-3)Glc(b1-3)Glc(b1-3)Glc(b1-3)Glc(b1-3)Glc(b1-3)Glc(b1-3)Glc(b1-3)Glc(b1-3)Glc(b1-1)aminopentanol | <i>Candida spp.</i>             | 127    |
| L-PneNAc(a1-2)GlcA(b1-3)FucNAc(a1-3)D-FucNAc(b1-1)aminopentanol                                                  | <i>Streptococcus pneumoniae</i> | 24,5   |
| Mixture of: D-6d-xylHexpNAc-4-ulo(b1-1)aminopentanol (Sugp(b1-1)aminopentanol) and D-FucNAc(b1-1)aminopentanol   | <i>Streptococcus pneumoniae</i> | 845,5  |
| Mixture of: FucNAc(a1-3)D-6d-xylHexpNAc-4-ulo(b1-1)aminopentanol and FucNAc(a1-3)D-FucNAc(b1-1)aminopentanol     | <i>Streptococcus pneumoniae</i> | 164    |
| FucNAc(a1-3)D-FucNAc(b1-1)aminopentanol                                                                          | <i>Streptococcus pneumoniae</i> | 301    |
| GlcA(b1-4)FucNAc(a1-1)aminopentanol                                                                              | <i>Streptococcus pneumoniae</i> | 336    |
| Glc(b1-3)FucNAc(a1-1)aminopentanol                                                                               | <i>Streptococcus pneumoniae</i> | 324,5  |
| L-PneNAc(a1-2)GlcA(b1-1)aminopentanol                                                                            | <i>Streptococcus pneumoniae</i> | 670    |
| L-PneNAc(a1-1)aminopentanol                                                                                      | <i>Streptococcus pneumoniae</i> | 279,5  |
| L-PneNAc(b1-1)aminopentanol                                                                                      | <i>Streptococcus pneumoniae</i> | 276,5  |
| Gal(b1-4)[Glc(b1-6)]GlcNAc(b1-3)Gal(b1-1)aminopentanol                                                           | <i>Streptococcus pneumoniae</i> | 289,5  |
| Glc(a1-4)Gal(a1-4)GlcA(b1-4)Glc(b1-1)aminoethanol                                                                | <i>Streptococcus pneumoniae</i> | 1735,5 |
| Glc(a1-4)Gal(a1-1)aminoethanol                                                                                   | <i>Streptococcus pneumoniae</i> | 919,5  |
| GlcA(b1-4)Glc(b1-4)Glc(a1-4)Gal(a1-1)aminoethanol                                                                | <i>Streptococcus pneumoniae</i> | 3351   |
| Glc(a1-4)Gal(a1-4)GlcA(b1-4)Glc(b1-1)aminopentanol                                                               | <i>Streptococcus pneumoniae</i> | 836,5  |
| Gal(a1-4)GlcA(b1-4)Glc(b1-4)Glc(a1-1)aminopentanol                                                               | <i>Streptococcus pneumoniae</i> | 60     |

|                                                                                       |                                 |        |
|---------------------------------------------------------------------------------------|---------------------------------|--------|
| GlcA(b1-4)Glc(b1-4)Glc(a1-4)Gal(a1-1)aminopentanol                                    | <i>Streptococcus pneumoniae</i> | 567    |
| Glc(b1-4)Glc(a1-4)Gal(a1-4)GlcA(b1-1)aminopentanol                                    | <i>Streptococcus pneumoniae</i> | 511,5  |
| Xyl(b1-4)Xyl(b1-1)aminopentanol                                                       |                                 | 642    |
| Xyl(b1-4)Xyl(b1-4)Xyl(b1-4)Xyl(b1-1)aminopentanol                                     |                                 | 4,5    |
| Xyl(b1-4)Xyl(b1-4)Xyl(b1-4)Xyl(b1-4)Xyl(b1-4)Xyl(b1-1)aminopentanol                   |                                 | 0      |
| Xyl(b1-4)Xyl(b1-4)Xyl(b1-4)Xyl(b1-4)Xyl(b1-4)Xyl(b1-4)Xyl(b1-4)Xyl(b1-1)aminopentanol |                                 | 0      |
| Glc(b1-4)Glc(b1-4)Glc(b1-4)Glc(b1-1)aminopentanol                                     |                                 | 85     |
| Glc(b1-3)GlcA(b1-4)Glc(b1-1)aminopentanol                                             | <i>Streptococcus pneumoniae</i> | 1175   |
| GlcA(b1-4)Glc(b1-1)aminoethanol                                                       | <i>Streptococcus pneumoniae</i> | 402,5  |
| Glc(b1-3)GlcA(b1-1)aminoethanol                                                       | <i>Streptococcus pneumoniae</i> | 282,5  |
| ManNAc(b1-3)FucNAc(a1-3)GalNAc(a1-4)Gal-2,3-pyruvate(a1-1)aminopentanol               | <i>Streptococcus pneumoniae</i> | 134    |
| GlcA(b1-1)aminoethanol                                                                |                                 | 1185,5 |
| Glc(a1-4)GalNAc(b1-4)Man(a1-1)aminopentanol                                           | <i>Toxoplasma gondii</i>        | 436    |
| Glc(a1-4)GalNAc(b1-4)[Man(a1-2)Man(a1-6)]Man(a1-1)aminopentanol                       | <i>Toxoplasma gondii</i>        | 2121,5 |
| Glc(a1-4)GalNAc(b1-4)[Man-6-PEtN(a1-2)Man(a1-6)]Man(a1-1)aminopentanol                | <i>Toxoplasma gondii</i>        | 1237,5 |
| GalNAc(b1-4)Man(a1-1)aminopentanol                                                    |                                 | 447,5  |
| GalNAc(b1-4)[Man-6-PEtN(a1-2)Man(a1-6)]Man(a1-1)aminopentanol                         |                                 | 804    |
| GalNAc(b1-4)[Man(a1-2)Man(a1-6)]Man(a1-1)aminopentanol                                |                                 | 2487   |
| GalNAc(b1-4)[Man-6-PEtN(a1-2)Man(a1-6)]Man-2-PEtN(a1-1)aminopentanol                  |                                 | 784    |

|                                                                                                              |                                 |        |
|--------------------------------------------------------------------------------------------------------------|---------------------------------|--------|
| GalNAc(b1-4)Man(a1-1)aminododecanol                                                                          |                                 | 163,5  |
| GalNAc(b1-4)Man(a1-1)p-aminocyclohexanol                                                                     |                                 | 0      |
| GlcA(b1-4)Glc(b1-3)GlcA(b1-1)aminoethanol                                                                    | <i>Streptococcus pneumoniae</i> | 19     |
| GlcA(b1-4)Glc(b1-3)Glc(b1-4)Glc(b1-1)aminoethanol and/or Glc(b1-4)Glc(b1-3)GlcA(b1-4)Glc(b1-1)aminoethanol   |                                 | 60,5   |
| Man(a1-1)aminopentanol                                                                                       |                                 | 3367,5 |
| GlcNAc-6-P-phosphoaminopentanol(a1-3)GlcNAc-6-P-phosphoaminopentanol(a1-2)glyceric acid                      | <i>Clostridium difficile</i>    | 283    |
| GlcA(a1-3)Gal(a1-3)ManNAc(b1-4)Glc(b1-4)Glc(a1-1)aminopentanol                                               | <i>Streptococcus pneumoniae</i> | 459    |
| GlcA(a1-3)Gal(a1-3)ManNAc-6-acetate(b1-4)Glc(b1-4)Glc(a1-1)aminopentanol                                     | <i>Streptococcus pneumoniae</i> | 0      |
| GlcA(a1-3)Gal(a1-1)aminopentanol                                                                             | <i>Streptococcus pneumoniae</i> | 425,5  |
| Glc(b1-4)Glc(a1-1)aminopentanol                                                                              |                                 | 1195,5 |
| ManNAc(b1-4)Glc(b1-4)Glc(a1-1)aminopentanol                                                                  | <i>Streptococcus pneumoniae</i> | 208,5  |
| GalNAc(b1-3)GalNAc(b1-1)aminopentanol                                                                        |                                 | 80     |
| Glc(b1-4)Gal(b1-4)Glc(b1-1)aminopentanol                                                                     |                                 | 116,5  |
| Rha(a1-3)[Rha(a1-3)Glc(b1-4)]Glc(a1-2)Glc(a1-1)aminopentanol                                                 | <i>Clostridium difficile</i>    | 893    |
| GlcNAc(a1-3)GlcNAc-6-P-phosphoaminopentanol(a1-2)glyceric acid                                               | <i>Clostridium difficile</i>    | 175    |
| GlcNAc(a1-3)GlcNAc[(a1-2)glyceric acid](6-P-6)GlcNAc(a1-3)GlcNAc-6-P-phosphoaminopentanol(a1-2)glyceric acid | <i>Clostridium difficile</i>    | 1288   |
| Man(a1-2)Man(a1-2)[Gal(b1-4)]Man(a1-1)aminoethanol                                                           | <i>Leishmania donovani</i>      | 1910,5 |
| Glc(b1-3)Gal(b1-4)Man(a1-1)aminopentanol                                                                     | <i>Leishmania chagasi</i>       | 304    |
| Rha(a1-2)Rha(a1-2)Rha(a1-1)aminopentanol                                                                     | <i>Klebsiella pneumoniae</i>    | 1507,5 |

|                                                                                                                                                                                                                                                                                                       |                                   |        |
|-------------------------------------------------------------------------------------------------------------------------------------------------------------------------------------------------------------------------------------------------------------------------------------------------------|-----------------------------------|--------|
| GalNAc-2,3-Oxazolidinone(a1-4)GalNAc-2,3-Oxazolidinone(a1-1)aminopentanol                                                                                                                                                                                                                             |                                   | 273    |
| Glc(a1-2)Glc(a1-3)[FucNAc(a1-3)GalNAc(b1-4)]ManNAcA(b1-1)aminopentanol                                                                                                                                                                                                                                | <i>Streptococcus pneumoniae</i>   | 1078,5 |
| Glc(a1-2)Glc(a1-3)[Gal(a1-3)FucNAc(a1-3)GalNAc(b1-4)]ManNAcA(b1-1)aminopentanol                                                                                                                                                                                                                       | <i>Streptococcus pneumoniae</i>   | 15     |
| Araf(a1-3)[Araf(a1-5)]Araf(a1-5)Araf(a1-1)aminopentanol                                                                                                                                                                                                                                               | <i>Mycobacterium tuberculosis</i> | 1706,5 |
| Man(a1-5)Araf(a1-3)[Man(a1-5)Araf(a1-5)]Araf(a1-5)Araf(a1-1)aminopentanol                                                                                                                                                                                                                             | <i>Mycobacterium tuberculosis</i> | 1593,5 |
| GalNAc-3,4-diacetate(a1-4)GalNAc-3-acetate(a1-4)GalNAc-3-acetate(a1-4)GalNAc-3-acetate(a1-1)aminopentanol                                                                                                                                                                                             |                                   | 300,5  |
| <sup>1</sup> Glycan and microbial origin data for this table retrieved from supplemental material in ref [27].<br><br><sup>2</sup> Concanavalin A (ConA) was used as a positive control in this glycan array. Only values for ConA are shown as no signals were detected for AsCTL-42 (see Fig. S3A). |                                   |        |
